# Supplementary material
Source: publisher figshare collection journal article supplement (https://tandf.figshare.com/articles/dataset/_/25817663)
Supplement: Supplementary file 1 [file 1]

SUPPL. TABLE 2. Distribution of rust fungi of the Fynbos and Succulent Karoo Biomes, and Afro-montane forests, in South Africa.

| Rust fungus                             | Host family                     | LH <sup>a</sup> | F <sup>b</sup> | SK | Af<br>M | SA <sup>c</sup> | Afr | C |
|-----------------------------------------|---------------------------------|-----------------|----------------|----|---------|-----------------|-----|---|
| <b>MELAMPSORINEAE</b>                   |                                 |                 |                |    |         |                 |     |   |
| <b><i>Milesinaceae</i></b>              |                                 |                 |                |    |         |                 |     |   |
| <i>Milesina blechni</i>                 | Blechnaceae,<br>Dryopteridaceae | O,I,II,III      |                |    | y       |                 |     | Y |
| <i>Milesina magellanica</i>             | Aspleniaceae                    | II              |                |    | y       |                 |     | Y |
| <i>Milesina nervisequa</i>              | Pteridaceae                     | II              |                |    | Y       |                 |     |   |
| <i>Milesina silvae-knysnae</i>          | Aspidiaceae                     | II              |                |    | Y       |                 |     |   |
| <i>Pucciniastrum agrimoniae</i>         | Rosaceae                        | II, III         |                |    | y       |                 |     | Y |
| <i>Uredinopsis pteridis</i>             | Denstaedtiaceae                 | O,I,II,III      | y              |    | y       |                 |     | Y |
| <b>RAVENELIINEAE</b>                    |                                 |                 |                |    |         |                 |     |   |
| <b><i>Phakopsoraceae</i></b>            |                                 |                 |                |    |         |                 |     |   |
| <i>Phakopsora tecta</i>                 | Commelinaceae                   | II,III          |                |    | y       |                 |     | Y |
| <i>Uredo fynbosense</i>                 | Rhamnaceae                      | II              | Y              |    |         |                 |     |   |
| <i>Uredo monechmatis</i>                | Acanthaceae                     | II              | y              |    |         |                 | Y   |   |
| <i>Uredo myricae</i>                    | Myricaceae                      | II              | Y              |    |         |                 |     |   |
| <i>Uredopeltis tarchonanathi</i>        | Asteraceae                      | II              | y              |    |         | Y               |     |   |
| <b><i>Raveneliaceae</i></b>             |                                 |                 |                |    |         |                 |     |   |
| <i>Cystoteliium inornata</i>            | Fabaceae                        | I,III           | y              | y  |         | Y               |     |   |
| <i>Cephoteliium macowaniana</i>         | Fabaceae                        | O,I,II,III      | y              | y  |         | Y               |     |   |
| <b>UREDININEAE</b>                      |                                 |                 |                |    |         |                 |     |   |
| <b><i>Pucciniaceae</i></b>              |                                 |                 |                |    |         |                 |     |   |
| <i>Endophyllum dimorphothecae</i>       | Asteraceae                      | O,I,III         |                | Y  |         |                 |     |   |
| <i>Endophyllum elytropappi</i>          | Asteraceae                      | I,III           | Y              |    |         |                 |     |   |
| <i>Endophyllum macowanii</i>            | Rhamnaceae                      | I,III           |                |    | y       |                 | Y   |   |
| <i>Endophyllum macowanianum</i>         | Asteraceae                      | I,III           | y              | y  |         |                 |     | Y |
| <i>Endophyllum metalasiae</i>           | Asteraceae                      | I,III           | Y              |    |         |                 |     |   |
| <i>Endophyllum osteospermi</i>          | Asteraceae                      | O,I,III         | y              |    |         | Y               |     |   |
| <i>Puccinia afra</i>                    | Solanaceae                      | I,II,III        |                | y  |         | Y               |     |   |
| <i>Puccinia amadelpha</i>               | Hyacinthaceae                   | I,II,III        | y              |    |         | Y               |     |   |
| <i>Puccinia anthospermi</i>             | Rubiaceae                       | III             | y              |    |         |                 | Y   |   |
| <i>Puccinia aridariae</i>               | Aizoaceae                       | II,III          |                | Y  |         |                 |     |   |
| <i>Puccinia aurea</i>                   | Orchidaceae                     | II,III          | Y              |    |         |                 |     |   |
| <i>Puccinia capensis</i>                | Iridaceae                       | III             | Y              |    |         |                 |     |   |
| <i>Puccinia contecta</i>                | Asphodelaceae                   | II,III          | Y              |    |         |                 |     |   |
| <i>Puccinia cynodontis</i>              | Poaceae                         | O,I,II,III      | y              |    |         |                 |     | Y |
| <i>Puccinia deformans</i>               | Montiniaceae                    | II,III          | Y              |    |         |                 |     |   |
| <i>Puccinia dehiscens</i>               | Iridaceae                       | II,III          | y              |    |         |                 | Y   |   |
| <i>Puccinia dichondrae</i>              | Convolvulaceae                  | III             | y              |    |         |                 |     | Y |
| <i>Puccinia dimorphothecae-cuneatae</i> | Asteraceae                      | III             | Y              |    |         |                 |     |   |
| <i>Puccinia dioscoreae-mundtii</i>      | Dioscoraceae                    | II,III          |                |    | Y       |                 |     |   |
| <i>Puccinia euphorbiae</i>              | Euphorbiaceae                   | II,III          | y              |    |         |                 |     | Y |
| <i>Puccinia evansii</i>                 | Euphorbiaceae                   | II,III          | y              |    |         | Y               |     |   |
| <i>Puccinia feliciicola</i>             | Asteraceae                      | O,I,II,III      | Y              |    |         |                 |     |   |
| <i>Puccinia galeniae</i>                | Aizoaceae                       | II,III          |                | y  |         | Y               |     |   |

|                                            |                 |            |   |   |   |   |   |   |
|--------------------------------------------|-----------------|------------|---|---|---|---|---|---|
| <i>Puccinia granularis</i>                 | Geraniaceae     | O,I,II,III | y |   |   |   | Y |   |
| <i>Puccinia hydrocotyles</i>               | Araliaceae      | O,I,II,III | y |   |   |   |   | Y |
| <i>Puccinia isoglossae</i>                 | Acanthaceae     | III        |   |   | y |   | Y |   |
| <i>Puccinia kalchbrenneriana</i>           | Hyacinthaceae   | O,I,II,III | y |   |   | Y |   |   |
| <i>Puccinia knersvlaktensis</i>            | Aizoaceae       | O,I,III    |   | Y |   |   |   |   |
| <i>Puccinia lycii</i> ssp. <i>bizonata</i> | Solanaceae      | I,II,III   |   | Y |   |   |   |   |
| <i>Puccinia lycii</i> ssp. <i>lycii</i>    | Solanaceae      | I,II,III   |   | y |   | Y |   |   |
| <i>Puccinia magnusiana</i>                 | Poaceae         | O,I,II,III | y | y |   |   |   | Y |
| <i>Puccinia menthae</i>                    | Lamiaceae       | O,I,II,III |   | y |   |   |   | Y |
| <i>Puccinia mesembryanthemi</i>            | Aizoaceae       | O,I,III    |   | y |   | Y |   |   |
| <i>Puccinia montis-venenosi</i>            | Rubiaceae       | II,III     |   | Y |   |   |   |   |
| <i>Puccinia moraeae</i>                    | Iridaceae       | II,III     | y |   |   | Y |   |   |
| <i>Puccinia myrsiphylli</i>                | Asparagaceae    | O,I,II,III | y |   | y | Y |   |   |
| <i>Puccinia naufraga</i>                   | Asteraceae      | I,II,III   | Y |   |   |   |   |   |
| <i>Puccinia ornithogali-thyrsoides</i>     | Hyacinthaceae   | II,III     | y |   |   | Y |   |   |
| <i>Puccinia othonnoides</i>                | Asteraceae      | II,III     | Y |   |   |   |   |   |
| <i>Puccinia otzeniani</i>                  | Aizoaceae       | O,I,III    |   | Y |   |   |   |   |
| <i>Puccinia pelargonii-zonalis</i>         | Geraniaceae     | II,III     | Y |   |   |   |   |   |
| <i>Puccinia phragmites</i>                 | Poaceae         | O,I,II,III | y |   |   |   |   | Y |
| <i>Puccinia phyllocladiae</i>              | Asparagaceae    | O,I,II,III | y | y |   |   |   | Y |
| <i>Puccinia polycampta</i>                 | Asphodelaceae   | II,III     | Y |   |   |   |   |   |
| <i>Puccinia pteroniae</i>                  | Asteraceae      | II,III     | y | y |   | Y |   |   |
| <i>Puccinia punctata</i>                   | Rubiaceae       | O,I,II,III | y |   |   |   |   | Y |
| <i>Puccinia rapipes</i>                    | Solanaceae      | O,I,II,III | Y |   |   |   |   |   |
| <i>Puccinia rocherpaniana</i>              | Asteraceae      | II,III     | Y | Y |   |   |   |   |
| <i>Puccinia stenotaphri</i>                | Poaceae         | II,III     | y |   |   |   |   | Y |
| <i>Puccinia stellenboschiana</i>           | Hypoxidaceae    | II,III     | Y |   |   |   |   |   |
| <i>Puccinia stonemanniae</i>               | Santalaceae     | O,I,II,III | y |   |   | Y |   |   |
| <i>Puccinia tetragoniae</i>                | Aizoaceae       | O,I,II,III | y | y |   |   |   | Y |
| <i>Puccinia tragiae</i>                    | Euphorbiaceae   | I,III      |   |   | y |   | Y |   |
| <i>Puccinia ursinae</i>                    | Asteraceae      | II,III     | Y |   |   |   |   |   |
| <i>Uromyces albucae</i>                    | Hyacinthaceae   | II,III     | y | y |   |   | Y |   |
| <i>Uromyces aloes</i>                      | Asphodelaceae   | O,III      | y | y |   |   | Y |   |
| <i>Uromyces antholyzae</i>                 | Iridaceae       | II,III     | Y |   |   |   |   |   |
| <i>Uromyces badius</i>                     | Amaryllidaceae  | O,I,II,III | Y |   |   |   |   |   |
| <i>Uromyces bolusii</i>                    | Fabaceae        | III        | Y |   |   |   |   |   |
| <i>Uromyces bulbinus</i>                   | Asphodelaceae   | III        | Y |   |   |   |   |   |
| <i>Uromyces chaetobromi</i>                | Poaceae         | II,III     |   | Y |   |   |   |   |
| <i>Uromyces cluytiae</i>                   | Euphorbiaceae   | II,III     | y |   |   |   | Y |   |
| <i>Uromyces eclipsis</i>                   | Zygophyllaceae  | I,III      | Y |   |   |   |   |   |
| <i>Uromyces ehrhartae-giganteae</i>        | Poaceae         | II,III     | Y |   |   |   |   |   |
| <i>Uromyces eriospermi</i>                 | Eriospermaceae  | O,I,II,III | y |   | y |   | Y |   |
| <i>Uromyces euryopsidicola</i>             | Asteraceae      | III        | Y | Y |   |   |   |   |
| <i>Uromyces holci</i>                      | Poaceae         | II,III     | y | y |   | Y |   |   |
| <i>Uromyces inaequialtus</i>               | Caryophyllaceae | O,I,II,III |   |   | y |   |   | Y |
| <i>Uromyces ixiae</i>                      | Iridaceae       | O,I,II,III | y |   |   | Y |   |   |
| <i>Uromyces kentaniensis</i>               | Iridaceae       | O,I,II,III | y |   |   | Y |   |   |
| <i>Uromyces lachenaliae</i>                | Hyacinthaceae   | O,I,II,III | Y | Y |   |   |   |   |
| <i>Uromyces lineolatus</i>                 | Cyperaceae      | O,I,II,III | y |   |   |   |   | Y |

|                                   |                |            |   |   |   |   |   |   |
|-----------------------------------|----------------|------------|---|---|---|---|---|---|
| <i>Uromyces lotononidicola</i>    | Fabaceae       | II,III     | y | y |   | Y |   |   |
| <i>Uromyces maireanus</i>         | Hyacinthaceae  | O,I,II,III | y |   |   |   | Y |   |
| <i>Uromyces massoniae</i>         | Hyacinthaceae  | O,I,II,III | y |   |   | Y |   |   |
| <i>Uromyces namaqualandus</i>     | Zygophyllaceae | III        |   | Y |   |   |   |   |
| <i>Uromyces paulshoekensis</i>    | Zygophyllaceae | II,III     |   | Y |   |   |   |   |
| <i>Uromyces pentaschistidis</i>   | Poaceae        | II,III     |   | Y |   |   |   |   |
| <i>Uromyces psoraleae</i>         | Fabaceae       | O,I,III    | y |   |   |   |   | Y |
| <i>Uromyces quaggafonteinus</i>   | Poaceae        | II,III     |   | Y |   |   |   |   |
| <i>Uromyces silksvleyensis</i>    | Orchidaceae    | III        | Y |   |   |   |   |   |
| <i>Uromyces stellenboschianus</i> | Hyacinthaceae  | II,III     | Y |   |   |   |   |   |
| <i>Uromyces strumariae</i>        | Amaryllidaceae | O,I,II,III | Y |   |   |   |   |   |
| <i>Uromyces trollipii</i>         | Zygophyllaceae | II,III     |   | Y |   |   |   |   |
| <i>Uromyces zeyheri</i>           | Iridaceae      | II,III     | Y |   |   |   |   |   |
| <i>Aecidium cluytiae</i>          | Euphorbiaceae  | O,I        | Y |   |   |   |   |   |
| <i>Aecidium dielsii</i>           | Fabaceae       | I          | y | y |   |   | Y |   |
| <i>Aecidium rehaniae</i>          | Asteraceae     | I          | Y |   |   |   |   |   |
| <i>Aecidium resinaecolum</i>      | Fabaceae       | I          | Y |   |   |   |   |   |
| <i>Aecidium wiborgiae</i>         | Fabaceae       | I          | Y | Y |   |   |   |   |
| <i>Uredo aspalathi</i>            | Fabaceae       | II         | Y |   |   |   |   |   |
| <i>Uredo guerichiani</i>          | Aizoaceae      | II         |   | Y |   |   |   |   |
| <i>Uredo leliefontinensis</i>     | Aizoaceae      | II         |   | Y |   |   |   |   |
| <i>Uredo otholobii</i>            | Fabaceae       | II         | Y |   |   |   |   |   |
| <i>Uredo polygalae</i>            | Polygalaceae   | II         | y |   |   | Y |   |   |
| <i>Uredo sarcocollae</i>          | Penaceae       | II         | Y |   |   |   |   |   |
| <i>Uredo zygophyllina</i>         | Zygophyllaceae | II         |   | Y |   |   |   |   |
| <b><i>Phragmidiaceae</i></b>      |                |            |   |   |   |   |   |   |
| <i>Kuehneola uredinis</i>         | Rosaceae       | O,II,III   | y |   | y |   |   | Y |
| <b><i>Crossopsoraceae</i></b>     |                |            |   |   |   |   |   |   |
| <i>Crossopora versoniae</i>       | Asteraceae     | II,III     |   |   | y |   | Y |   |
| <i>Aecidium</i> sp. nov.          | Rubiaceae      | O,I        |   |   | y | Y |   |   |

<sup>a</sup>Life history, spore stages present: O = spermatogonia, I = catenulate, verrucose asexual spores, II = pedicelate, echinulate asexual spores, III = teliospores, I<sup>III</sup> = endocyclic. Grey blocks indicate heteroecious species, all other species are autoecious. Bold indicates only spore stages of life history to occur in South Africa when not all are present.

<sup>b</sup>Distribution within biomes as indicated: F = Fynbos biome; SK = Succulent karoo biome; AfM = Afro-montane forest.

<sup>c</sup>Distribution outside the biomes indicated: SA = South Africa; Afr = Africa; C = Cosmopolitan (or at least occurring on one other continent in addition to Africa).

<sup>d</sup>Y = endemic within biome or region; y = present but not endemic
