# Supplementary material
Source: publisher figshare collection journal article supplement (https://tandf.figshare.com/articles/dataset/_/25817663)
Supplement: Supplementary file 1 [file 1]

## Sheet: Sheet1
SUPPL. TABLE 1: List of rust specimens included in this study, with voucher number, GenBank number and source.
genus	species	Herb. Voucher No.a	28S	18S	CO3	ITS	qualifiers/notes	Collectora	Collection No.a	seq no.	year	host	Country: Stateb	Stage	Sourcec
Achrotelium	ichnocarpi	BRIP55634	KT199393	KT199381	KT199404	--		N/A	N/A	BRIP55634	N/A	Apocynaceae; Ichnocarpus frutescens	Australia: Queensland		McTaggart et al. 2016.
Aecidium	crini	PURN22783 / PREM62242	OQ214974	--	--	--		A. Wood	AW1015	U1710	2018	Amaryllidaceae; Crinum moorei	SA: KwaZulu-Natal	1	This paper.
Aecidium	dielsii	BPI877821 / PREM58672	OQ214975	--	--	--		A. Wood	AW579	U465	2004	Fabaceae; Lebeckia sp.	SA: Western Cape	I	This paper.
Aecidium	dubiosum	BPI871735 / PREM59014	OQ214976	--	--	--		A. Wood	AW607	U534	2005	Asteraceae; Senecio tamoides	SA: Mpumalanga	I	This paper.
Aecidium	dubiosum	BPI877818 / PREM59014	OQ214977	--	--	--		A. Wood	AW607	U752	2005	Asteraceae; Senecio tamoides	SA: Mpumalanga		This paper.
Aecidium	evansii	BPI872225 / PREM59105	OQ214978	--	--	--		A. Wood	AW631	U894	2006	Verbenaceae; Lantana rugosa	SA: North-West	I	This paper.
Aecidium	kraussiae	PURN22787 / PREM63168	OQ214979	OQ215126	OR789133	--		A. Wood	AW987	U1714	2018	Rubiaceae; Kraussia floribunda	SA: KwaZulu-Natal	I	This paper.
Aecidium	kraussiae	PURN23543 / PREM63196	OQ214980	--	--	--		A. Wood	AW1075	U1764	2020	Rubiaceae; Kraussia floribunda	SA: KwaZulu-Natal	I	This paper.
Aecidium	kraussiae	PURN23559 / PREM63195	OQ214981	--	--	--		A. Wood	AW1074	U1765	2020	Rubiaceae; Kraussia floribunda	SA: KwaZulu-Natal	I	This paper.
Aecidium	resinicola	BPI877820 / PREM59015	OQ214982	--	--	--		A. Wood	AW618	U737	2005	Fabaceae; Rafnia amplexicaulis	SA: Western Cape	OI	This paper.
Aecidium	sp.	PURN16313	OQ214973	--	--	--		S. Neser	s.n.	U1397	2008	Apocynaceae; Gomphocarpus fruticosus	SA: North-West		This paper.
Aecidium	sp. nov.	PURN22785 / PREM63165	OQ214983	OQ215127	OR789143	--		A. Wood	AW967	U1712	2016	Rubiaceae; Canthium mundianum	SA: Western Cape	I	This paper.
Aecidium	transvaaliae	PURN16283 / PREM63158	OQ214984	--	--	--		A. Wood	AW821	U1490	2011	Rubiaceae; Pavetta schumanniana	SA: Mpumalanga	II	This paper.
Aecidium	vangueriae	BPI871736 / PREM63147	OQ214985	--	--	--		A. Wood	AW611	U533	2005	Rubiaceae; Vangueria infausta	SA: KwaZulu-Natal	I	This paper.
Aecidium	vangueriae	PURN16279 / PREM63159	OQ214986	--	--	--		A. Wood	AW887	U1487	2012	Rubiaceae; Vangueria infausta	SA: KwaZulu-Natal	I	This paper.
Aecidium	vernoniae-podocomae	BPI877822 / PREM59016	OQ214987	--	--	--		A. Wood	AW626	U751	2005	Asteraceae; Vernonia myriantha	SA: Mpumalanga	I	This paper.
Aecidium	wiborgiae	BPI871524 / PREM58337	OQ214989	--	--	--		A. Wood	AW576	U380	2004	Fabaceae; Wiborgia sp.	SA: Western Cape	I	This paper.
Aecidium	wiborgiae	BPI871525 / PREM58338	OQ214988	--	--	--		A. Wood	AW573	U379	2004	Fabaceae; Wiborgia sp.	SA: Western Cape	I	This paper.
Angiopsora	apoda	PURN23661	OQ214990	--	OR789144	--		M.C. Aime	MCA2972	MCA2972	2005	Poaceae; Cenchrus sp.	United States: Hawaii		This paper.
Angiopsora	paspalicola	BRIP55625	MW049243	--	--	--		N/A	N/A	BRIP 55625	N/A	Poaceae; Paspalum sp.	Australia		Aime & McTaggart 2020.
Angusia	lonchocarpi	PURN16344 / PREM59113	OQ214991	--	--	--		A. Wood	AW650	U1346	2006	Fabaceae; Lonchocarpus capassa	SA: Limpopo	II	This paper.
Angusia	lonchocarpi	PURN16514/ PREM60130	OQ214992	--	--	--		A. Wood	AW731	U1366	2008	Fabaceae; Lonchocarpus capassa	SA: Mpumalanga		This paper.
Bubakia	stratosa	PURN16403 / PREM60116	OQ214993	--	--	--		A. Wood	AW712	U1347	2008	Euphorbiaceae; Croton sylvaticus	SA: KwaZulu-Natal		This paper.
Bubakia (as Phakopsora)	argentinensis	ZT RB 8248	KF528009	KF528039	KF528047	--		N/A	N/A	ZTRB8248	N/A	Euphorbiaceae; Croton cf. anisodontus	Brazil		Beenken 2014.
Cephalotelium	evansii	BPI878099 / PREM59043	OQ214994	--	--	--		A. Wood	AW621	U744	2005	Fabaceae; Acacia sieberiana	SA: KwaZulu-Natal	II	This paper.
Cephalotelium	macowaniana	BPI871520	OQ214999	--	--	--		Z.A. Pretorius	U540	U540	2005	Fabaceae; Vachellia karroo	SA: Free State	I	This paper.
Cephalotelium	macowaniana	BPI871550 / PREM58377	OQ214995	--	--	--		A. Wood	AW566	U373	2004	Fabaceae; Vachellia karroo	SA: Northern Cape	III	This paper.
Cephalotelium	macowaniana	BPI871551 / PREM58376	OQ214996	--	--	--		A. Wood	AW565	U375	2004	Fabaceae; Vachellia karroo	SA: Northern Cape	III	This paper.
Cephalotelium	macowaniana	BPI871794 / PREM59044	OQ214998	--	--	--	mixed infection with Cystotelium inornata	A. Wood	AW588	U449	2004	Fabaceae; Vachellia karroo	SA: Western Cape	III	This paper.
Cephalotelium	macowaniana	PURN22791 / PREM59045	OQ214997	OQ215128	OR789140	--	mixed infection with Cystotelium inornata	A. Wood	AW570	U376	2006	Fabaceae; Vachellia karroo	SA: Western Cape		This paper.
Cephalotelium (as Ravenelia)	acaciae-arabicae	PREM61853	MN072675	--	--	--		N/A	N/A	PREM61853	N/A	Fabaceae; Vachellia nilotica	SA: KwaZulu-Natal		Ebinghaus et al. 2020
Cephalotelium (as Ravenelia)	acaciae-arabicae	PREM61854	MN072674	--	MN095319	--		N/A	N/A	PREM61854	N/A	Fabaceae; Vachellia nilotica	SA: KwaZulu-Natal		Ebinghaus et al. 2020
Cephalotelium (as Ravenelia)	evansii	PREM61224	MN275523	--	--	--		N/A	N/A	PREM61224	N/A	Fabaceae; Vachellia davyi	SA: Mpumalanga		Ebinghaus et al. 2020
Cephalotelium (as Ravenelia)	evansii	PREM61845	MG946000	--	MN095322	--		N/A	N/A	PREM61845	N/A	Fabaceae; Vachellia davyi	SA: KwaZulu-Natal		Ebinghaus et al. 2020
Cephalotelium (as Ravenelia)	evansii	PREM61846	MN095321	--	MG945993	--		N/A	N/A	PREM61846	N/A	Fabaceae; Vachellia luederitzii var. retinens	SA: KwaZulu-Natal		Ebinghaus et al. 2020
Cephalotelium (as Ravenelia)	macowaniana	PREM61222	MG946007	--	MN095331	--		N/A	N/A	PREM61222	N/A	Fabaceae; Vachellia karroo	SA: Limpopo		Ebinghaus & Begerow. 2018.; Ebinghaus et al. 2020.
Cephalotelium (as Ravenelia)	macowaniana	PREM61875	MG946014	--	MN095327	--		N/A	N/A	PREM61875	N/A	Fabaceae; Vachellia permixta	SA: Limpopo		Ebinghaus & Begerow. 2018.; Ebinghaus et al. 2020.
Cephalotelium (as Ravenelia)	xanthophloeae	PREM61000	MG946016	--	--	--		N/A	N/A	PREM61000	N/A	Fabaceae; Vachellia xanthophloea	SA: Mpumalanga		Ebinghaus & Begerow. 2018.; Ebinghaus et al. 2020.
Cephalotelium (as Ravenelia)	xanthophloeae	PREM61213a	MG946015	--	--	--		N/A	N/A	PREM61213a	N/A	Fabaceae; Vachellia xanthophloea	SA: KwaZulu-Natal		Ebinghaus et al. 2020
Cephalotelium (as Ravenelia)	xanthophloeae	PREM61215	MG946017	--	--	--		N/A	N/A	PREM61215	N/A	Fabaceae; Vachellia xanthophloea	SA: Mpumalanga		Ebinghaus & Begerow. 2018.; Ebinghaus et al. 2020.
Coleosporium	asterum	BPI843401	--	--	--	OQ183713		J. Hernandez	2003-008	U51	2003	Asteraceae; Solidago nemoralis	United States: Maryland		This paper.
Coleosporium	hedyotidis	BPI872227	MG907222	--	--	--		A. Wood	AW641	U896	2006	Rubiaceae; Kadua sp.	SA: KwaZulu-Natal		Aime et al. 2018.
Coleosporium	hewittiae	PURN16340 / PREM60119	MF769640	OQ215129	OR789145	OQ183718 (clone 1); OQ183719 (clone 2); OQ183720 (clone 3)		A. Wood	AW715	U1343	2008	Convolvulaceae; Hewittea malabarica	SA: KwaZulu-Natal		McTaggart & Aime 2018.; This paper.
Coleosporium	ipomoeae	PURN16510	MF763639	--	--	MF769625 (clone 1); MF69624 (clone 2)		M.C. Aime	MCA3853	MCA3853	2009	Convolvulaceae; Ipomoea sp.	United States: Louisiana		McTaggart & Aime 2018.; This paper.
Coleosporium	ipomoeae	PURN6725	MF769678	OQ215130	OR789146	--		M.C. Aime	MCA4545	MCA4545	2011	Convolvulaceae; Ipomoea cordata-triloba	United States: Louisiana		McTaggart & Aime 2018.; This paper.
Coleosporium	plumeriae	N/A	--	--	--	MH656772		N/A	N/A	MH656772	N/A	Apocynaceae; Plumeria rubra	India		Reddy & Munilakshmi unpublished.
Coleosporium	plumeriae	N/A	--	--	--	MK788147		N/A	N/A	MK788147	N/A	Apocynaceae; Plumeria rubra	Indonesia		Oliveira et al. 2019.
Coleosporium	plumeriae	N/A	--	--	--	MK788148		N/A	N/A	MK788148	N/A	Apocynaceae; Plumeria rubra	Indonesia		Oliveira et al. 2019.
Coleosporium	plumeriae	N/A	KR110056	--	--	--		N/A	N/A	wm3695	N/A	Apocynaceae; Plumeria sp.	SA: KwaZulu-Natal		Maier et al. unpublished.
Coleosporium	plumeriae	PURN16639	--	--	--	MF769626 (clone 1); MF769627 (clone 2); MF69628 (clone 3); MF769629 (clone 4)		M.C. Aime	MCA3480	MCA3480	2007	Apocynaceae; Plumeria sp.	Malaysia		McTaggart & Aime 2018.; This paper.
Coleosporium	solidaginis	PURN16642	--	--	--	MF29230 (clone 1); MF68631 (clone 2); MF69632 (clone 3); MF69633(clone 4); MF69634 (cone 5)		M.C. Aime	MCA3473	MCA3473	2007	Asteraceae; Solidago sp.	United States: Louisiana		This paper.
Coleosporium	solidaginis	PURN22361	--	--	--	OQ183714		M.C. Aime	MCA3718	MCA3718	2009	Asteraceae; Solidago sp.	United States: Louisiana		This paper.
Coleosporium	tussilaginis	PURN16574	--	--	--	OQ183715		M.C. Aime	MCA4143	MCA4143	2010	Asteraceae; Petasites albus	Scotland: Edinburough		This paper.
Coleosporium	vernoniae	PURN11638	--	--	--	OQ183716		M.C. Aime	MCA3792	MCA3792	2009	Asteraceae; Elephantopus sp.	United States: Texas		This paper.
Coleosporium	vernoniae	PURN6723	--	--	--	OQ183717		M.C. Aime	MCA3894	MCA3894	2010	Pinaceae; Pinus palustris	United States: Louisiana		This paper.
Crossopsora	brachylaenae	BPI844296 / PREM58689	OQ215000	--	--	--		A. Wood	AW544	U262	2004	Asteraceae; Brachylaena discolor	SA: KwaZulu-Natal	II	This paper.
Crossopsora	brachylaenae	BPI871638 /PREM59052	OQ215001	--	--	--		A. Wood	AW609	U544	2005	Asteraceae; Brachylaena discolor	SA: KwaZulu-Natal	II	This paper.
Crossopsora	gilgiana	BPI877875 / PREM59019	OQ215004	OQ215131	--	--		A. Wood	AW622	U749	2005	Ebanaceae; Euclea natalensis	SA: KwaZulu-Natal		This paper.
Crossopsora	sekhukhunenensis	BPI877877 / PREM59108	MG744558	--	--	--		A. Wood	AW646	U904	2006	Rhamnaceae; Ziziphus mucronata	SA: Limpopo		This paper.
Crossopsora	sekhukhunenensis	PURN16466 / PREM60128	OQ215002	--	OR789142	--		A. Wood	AW729	U1367	2008	Rhamnaceae; Ziziphus mucronata	SA: Limpopo		This paper.
Crossopsora	vernoniae	BPI871509 / PREM58356	OQ215005	--	--	--		A. Wood	AW368	U256	2002	Asteraceae; Vernonia espilifolia	SA: Western Cape	II	This paper.
Crossopsora	vernoniae	BPI871757 / PREM58579	OQ215003	--	--	--		A. Wood	AW608	U537	2005	Asteraceae; Vernonia wollastonii	SA: Mpumalanga	II	This paper.
Cystotelium	inornata	PURN22791 / PREM59046	OQ215006	--	--	--	mixed infection; aecia extraction	A. Wood	AW570	U376a	2006	Fabaceae; Vachellia karroo	SA: Western Cape	I	This paper.
Cystotelium (as Ravenelia)	inornata	KR-M-0006613	MN072666	--	--	--		N/A	N/A	KRM0006613	N/A	Fabaceae; Vachellia natalitia	SA: KwaZulu-Natal		Ebinghaus et al. 2020
Cystotelium (as Ravenelia)	inornata	PREM60135	MN072684	--	MN095310	--		N/A	N/A	PREM60135	N/A	Fabaceae; Vachellia karroo	SA: Western Cape		Ebinghaus et al. 2020
Diorchidium	woodii	BPI877881 / PREM60110	OQ215007	--	--	--		A. Wood	AW700	U1241	2006	Fabaceae; Millettia grandis	SA: KwaZulu-Natal	III	This paper.
Diorchidium	woodii	PURN11053	MW111533	MW111538	--	--		A. Wood	AW881	U1475	2011	Fabaceae; Millettia grandis	SA: KwaZulu-Natal	III	Aime & McTaggart 2021.
Diorchidium	woodii	PURN16350 / PREM60125	OQ215008	--	--	--		A. Wood	AW725	U1353	2008	Fabaceae; Millettia grandis	SA: KwaZulu-Natal	III	This paper.
Endophyllum	elytropappi	BPI844289 / PREM58341	OQ215010	--	--	--	cf.	A. Wood	AW564	U306	2004	Asteraceae; Stoebe plumosa	SA: Western Cape	iiii	This paper.
Endophyllum	elytropappi	BPI871502 / PREM58340	OQ215009	--	--	--		A. Wood	AW534	U254	2003	Asteraceae; Elytropappus rhinocerotis	SA: Western Cape	iiii	This paper.
Endophyllum	macowanianum	BPI871503 / PREM58345	OQ215011	--	--	--		A. Wood	AW554	U308	2004	Asteraceae; Conyza ulmifolia	SA: KwaZulu-Natal	iiii	This paper.
Endophyllum	macowanianum	BPI871743 / PREM59021	OQ215012	--	--	--		A. Wood	AW614	U616	2005	Asteraceae; Conyza scabrida	SA: Western Cape	iiii	This paper.
Endophyllum	macowanii	BPI871504 / PREM57835	OQ215013	--	--	--		A. Wood	AW517	U255	2003	Rhamnaceae; Rhamnus prinoides	SA: Western Cape	iiii	This paper.
Endophyllum	macowanii	BPI871744 / PREM59020	OQ215014	--	--	--		A. Wood	AW597	U535	2004	Rhamnaceae; Rhamnus prinoides	SA: Western Cape	iiii	This paper.
Endophyllum	mpenjatiense	PURN16348	OQ215015	--	--	--		A. Wood	AW719	U1352	2008	Malvaceae; Hibiscus cannabinus	SA: KwaZulu-Natal		This paper.
Endophyllum	mpenjatiense	PURN22781 / PREM62241	OQ215016	OQ215132	OR789138	--		A. Wood	AW1012	U1708	2018	Malvaceae; Hibiscus calyphyllus	SA: KwaZulu-Natal		This paper.
Endophyllum	osteospermi	PREM57888	OQ215018	--	--	--		A. Wood	AW380	ARW82	2002	Asteraceae; Chrysanthemoides monilifera ssp. pisifera	SA: Western Cape	iiii	This paper.
Endophyllum	osteospermi	PREM57893	OQ215017	--	--	--		A. Wood	AW514	ARW81	2003	Asteraceae; Chrysanthemoides monilifera ssp. monilifera	SA: Western Cape	iiii	This paper.
Endophyllum	osteospermi	PREM57898	OQ215020	--	--	--		A. Wood	AW525	ARW84	2003	Asteraceae; Chrysanthemoides incana	SA: Western Cape	iiii	This paper.
Endophyllum	osteospermi	PREM57902	OQ215019	--	--	--		A. Wood	AW383	ARW83	2002	Asteraceae; Osteospermum polygaloides	SA: Western Cape	iiii	This paper.
Endoraecium	acaciae	BPI871098	DQ323916	DQ323917	--	--		M.C. Aime	MCA2957	MCA2957	2005	Fabaceae; Acacia koa	United States: Hawaii		Scholler & Aime 2006.
Hamaspora	longissima	BPI871506 / PREM58351	MW049262	MW049297	--	--		A. Wood	AW559	U305	2004	Rosaceae; Rubus ludwigii	SA: Free State		This paper.
Hemileia	ectadiopsidis	PURN16278 / PREM61406	OQ215021	OQ215133	--	--		A. Wood	AW885	U1486	2012	Apocynaceae; Cryptolepis oblongifolia	SA: KwaZulu-Natal		This paper.
Hemileia	fadogiae	BPI878108 / PREM59124	OQ215022	--	--	--		A. Wood	AW640	U900	2006	Rubiaceae; Pygmaeothamnus chamaedendrum	SA: KwaZulu-Natal		This paper.
Hemileia	gardeniae-thunbergiae	BPI871663 / PREM58674	OQ215023	--	--	--		A. Wood	AW584	U461	2004	Rubiaceae; Gardenia thunbergia	SA: Mpumalanga		This paper.
Hemileia	scholzii	PURN16280 / PREM60938	OQ215024	--	--	--		A. Wood	AW888	U1484	2012	Lamiaceae; Clerodendrum glabrum	SA: KwaZulu-Natal		This paper.
Hemileia	scholzii	PURN16343	--	OQ215134	OR789147	--		A. Wood	AWW723	U1345	2008	Lamiaceae; Clerodendrum glabrum	SA: KwaZulu-Natal		This paper.
Hemileia	vastatrix	BPI843642	DQ354566	DQ354565	--	--		J. Hernandez	2002-004	U127	2002	Rubiaceae; Coffea arabica	Mexico		Aime 2006.
Hemileia	woodii	BPI872229 / PREM59111	OQ215025	--	--	--		A. Wood	AW648	U897	2006	Rubiaceae; Vangueria infausta	SA: Mpumalanga		This paper.
Hemileia	woodii	PURN16277 / PREM60939	OQ215026	--	--	--		A. Wood	AW886	U1485	2012	Rubiaceae; Pachystigma latifolium	SA: KwaZulu-Natal		This paper.
Kuehneola	uredinis	BPI871507 / PREM58352	OQ215027	OQ215135	--	--		A. Wood	AW563	U303	2004	Rosaceae; Rubus pinnatus	SA: Western Cape		This paper.
Kweilingia	divina	PURN11077	--	MG907205	--	--		M.C. Aime	MCA4684	MCA4684	2012	Poaceae	Taiwan		Aime et al. 2018.
Kweilingia	divina	PURN16633	MG907215	--	MG907266	--		M.C. Aime	MCA3493	MCA3493	2007	Poaceae	Malaysia		Aime et al. 2018.
Macruropyxis	fraxini	ZT Myc 56551	KP858145	KP858144	--	--		N/A	N/A	ZTMyc56551	N/A	Oleaceae; Fraxinus platypoda	Japan		Beenken & Wood 2015.
Macruropyxis	fulva	N/A	JX036028	--	--	--		N/A	N/A	P8	N/A	Poaceae; Saccharum hybrid	SA: KwaZulu-Natal		Martin et al. 2017.
Maravalia	limoniformis	BRIP59649	MW049266	--	MW036500	--		N/A	N/A	BRIP59649	N/A	Fabaceae; Austrosteenisia blackii	N/A		Aime & McTaggart 2020.
Maravalia	mimusops	PURN22948	OQ215028	OQ215136	OR789139	--		A. Wood	AW1011	U1707	2018	Sapotaceae; Mimusops caffera	SA: KwaZulu-Natal		This paper.
Masseeëlla	flueggeae	PURN16536 / PREM60133	OQ215029	--	--	--		A. Wood	AW736	U1365	2008	Phyllanthaceae; Flueggea virosa	SA: Mpumalanga		This paper.
Mikronegeria	fagi	PURN16373	MW049267	MW049298	OR789149	--		M. Smith	MES1481	MES1481	2016	Nothofagaceae; Nothofagus obliqua	Chile		Aime & McTaggart 2021.; This paper.
Neophysopella (as Phakopsora)	ampelopsidis	IBAR-10128	KC815629	--	--	--		N/A	N/A	IBAR10128	N/A	N/A	Japan		Pota et al. 2015.
Neoravenelia	dichrostachydis	KR-M-0006448	MN072690	--	MN095332	--		N/A	N/A	KRM0006448	N/A	Fabaceae; Dichrostachys cinerea	SA: Mpumalanga		Ebinghaus et al. 2020
Phakopsora	combretorum	PURN16368 / PREM60118	OQ215030	--	--	--		A. Wood	AW714	U1351	2008	Combretaceae; Combretum sp.	SA: KwaZulu-Natal		This paper.
Phakopsora	combretorum	PURN16406 / PREM60132	OQ215032	--	--	--		A. Wood	AW735	U1370	2008	Combretaceae; Combretum hereroense	SA: Mpumalanga		This paper.
Phakopsora	combretorum	PURN22458 /PREM60081	OQ215031	--	--	--		A. Wood	AW734	U1369	2008	Combretaceae; Combretum apiculatum	SA: Mpumalanga		This paper.
Phakopsora	pachyrhizi	BPI877961	OQ215033	--	--	--		M. Liebenberg	s.n.	U1156	2006	Fabaceae; Glycine max	SA: KwaZulu-Natal		This paper.
Phakopsora	pachyrhizi	BPI877962	OQ215034	--	--	--		M. Liebenberg	s.n.	U1157	2005	Fabaceae; Phaseolus vulgaris	SA: KwaZulu-Natal		This paper.
Phakopsora	pachyrhizi	BPI877963	OQ215035	--	--	--		M. Liebenberg	s.n.	U1164	2006	Fabaceae; Pisum sativum	SA: KwaZulu-Natal		This paper.
Phakopsora	tecta	BPI877965 / PREM59022	OQ215036	--	--	--		A. Wood	AW610	U536	2005	Commeliniaceae; Aneilema aequinoctiale	SA: KwaZulu-Natal		This paper.
Porotenus	biporus	ZT Myc 3414	JF263510	--	JF263494	--		N/A	N/A	ZTMyc3414	N/A	Bignoniaceae; Memora flavida	French Guiana		Beenken et al. 2012.
Prospodium	transformans	PURN11105	MW147031	--	OR789141	--		S Neser; F. Heystek	s.n.	U1506	2011	Bignoniaceae; Tecoma stans var. velutina	Mexico		Aime & McTaggart 2021; This paper.
Puccinia	aecidiiformis	BPI871513 / PREM58357	OQ215037	OQ215137	--	--		A. Wood	AW541	U257	2004	Asteraceae; Microglossa sp.	SA: KwaZulu-Natal	III	This paper.
Puccinia	aridariae	N/A	DQ917724	--	--	--		N/A	N/A	RSA153	N/A	Aizoaceae; Mesembranthemum guerichianum	SA		Maier et al. 2007.
Puccinia	aridariae	N/A	DQ917725	--	--	--		N/A	N/A	RSA155	N/A	Aizoaceae; Aridaria noctiflora	SA		Maier et al. 2007.
Puccinia	batatus	PURN16407 / PREM60122	OQ215038	--	--	--		A. Wood	AW722	U1348	2008	Convolvulaceae; Ipomoea mauritiana	SA: KwaZulu-Natal		This paper.
Puccinia	berkheyaephila	PURN16079 /PREM60108	OQ215039	--	--	--		A. Wood	AW689	U1057	2006	Asteraceae; Berkheya bipinnatifda	SA: Eastern Cape		This paper.
Puccinia	berkheyicola	BPI871627 / PREM58358	MG907247	--	--	--		A. Wood	AW557	U314	2004	Asteraceae; Berkheya setifera	SA: Free State		Aime et al. 2018.
Puccinia	chloridis	N/A	KM096427	--	--	--		N/A	N/A	HSZ1393	N/A	Poaceae; Chloris virgata	N/A		Mahadevakumar et al. unpublished.
Puccinia	coronata	PURN15106	OQ215041	--	--	--	var. coronata	D. Nelsen	DJN182	DJN182	2012	Poaceae; Festuca arundinacea	Japan		This paper.
Puccinia	deformans	PURN22869 / PREM60949	OQ215042	OQ215138	--	--		A. Wood	AW891	U1483	2011	Montiniaceae; Montinia caryophyllacea	SA: Western Cape		This paper.
Puccinia	digitariae	BPI012249	KY575082	--	--	--		N/A	N/A	BPI012249	N/A	Poaceae; Digitaria debilis	SA: Cape Province		Demers & Castlebury unpublished.
Puccinia	digitariae	PURN22790 / PREM60095	OQ215065	OQ215139	OR789134	--		A. Wood	AW602	U550	2004	Solanaceae; Solanum sp.	SA: Mpumalanga		This paper.
Puccinia	digitariae	PURN23544 / PREM59106	OQ215066	--	--	--		A. Wood	AW629	U895	2006	Solanaceae; Solanum panduriforme	SA: North-West	I	This paper.
Puccinia	digitariae	PURN23545	OQ215063	--	--	--		S. Neser	N/A	U548	2004	Solanaceae; Solanum panduriforme	SA: Ganteng	I	This paper.
Puccinia	digitariae	PURN23546	OQ215064	--	--	--		S. Neser	N/A	U549	2004	Solanaceae; Solanum sp.	SA: Ganteng	I	This paper.
Puccinia	digitariae	BPI012249	KY575082	--	--	--		A. Pegler	N/A	NA152	1922	Poaceae; Digitaria debilis	SA: Cape Province
Puccinia	dioscoreae-mundtii	BPI871801 / PREM59116	OQ215043	--	--	--		A. Wood	AW337B	U458	2001	Dioscoreaceae; Dioscorea mundtii	SA: Western Cape		This paper.
Puccinia	exhauriens	BPI871770 / PREM59026	OQ215045	--	--	--		A. Wood	AW605	U539	2005	Oleaceae; Jasminum abyssinicum	SA: Mpumalanga		This paper.
Puccinia	exhauriens	BPI871771 / PREM59025	OQ215044	--	--	--		A. Wood	AW600	U538	2004	Oleaceae; Jasminum fluminense	SA: Mpumalanga		This paper.
Puccinia	fagarae	PURN22784 / PREM62284	OQ215046	OQ215140	OR789135	--		A. Wood	AW962	U1711	2015	Rutaceae; Zanthoxylum sp.	SA: Eastern Cape		This paper.
Puccinia	galeniae	N/A	DQ917729	--	--	--		N/A	N/A	RSA162	N/A	Aizoaceae; Galenia crystallina	SA		Maier et al. 2007.
Puccinia	galeniae	N/A	DQ917730	--	--	--		N/A	N/A	RSA148	N/A	Aizoaceae; Aizoon canariense	SA		Maier et al. 2007.
Puccinia	granularis	BPI871774 / PREM58675	OQ215047	--	--	--		A. Wood	AW580	U443	2004	Geraniaceae; Pelargonium alchemilloides	SA: Western Cape		This paper.
Puccinia	granularis	BPI871775 / PREM58676	OQ215048	--	--	--		A. Wood	AW581	U444	2004	Geraniaceae; Pelargonium cucullatum	SA: Western Cape	II; III	This paper.
Puccinia	granularis	BPI878027 / PREM59027	OQ215049	--	--	--		A. Wood	AW616	U746	2005	Geraniaceae; Pelargonium gibbosum	SA: Western Cape		This paper.
Puccinia	kalchbrenneriana	BPI844304 / PREM58362	OQ215051	--	--	--		A. Wood	AW555	U313	2004	Asteraceae; Helichrysum sp.	SA: Free State		This paper.
Puccinia	kalchbrenneriana	BPI871542 / PREM58364	OQ215050	--	--	--		A. Wood	AW560	U312	2004	Asteraceae; Helichrysum sp.	SA: Free State		This paper.
Puccinia	kalchbrenneriana	PURN13868 / PREM58361	OQ215040	--	--	--		A. Wood	AW539	U258	2004	Asteraceae; Helichrysum sp.	SA: KwaZulu-Natal		This paper.
Puccinia	knersvlaktensis	N/A	DQ917726	--	--	--		N/A	N/A	RSA176	N/A	Aizoaceae; Mesembranthemum nodiflorum	SA		Maier et al. 2007.
Puccinia	knersvlaktensis	N/A	DQ917727	--	--	--		N/A	N/A	RSA33	N/A	Aizoaceae; Mesembranthemum nodiflorum	SA		Maier et al. 2007.
Puccinia	koedoeensis	BPI872245 / PREM59118	OQ215052	--	--	--		S. Neser	s.n.	U905	2006	Asteraceae; Vernonia galpinii	SA: North-West		This paper.
Puccinia	kraussiana	PURN16411 / PREM60121	OQ215053	--	--	--		A. Wood	AW721	U1349	2008	Smilacaceae; Smilax anceps	SA: KwaZulu-Natal		This paper.
Puccinia	lagenophorae	BPI871543 / PREM58360	OQ215054	--	--	--		A. Wood	AW569	U384	2004	Asteraceae; Osteocarpum clandestinum	SA: Western Cape	I; III	This paper.
Puccinia	lagenophorae	PREM59341	FJ669245	--	--	--		M. Mennicken	RSA130	FJ669245	2002	Asteraceae; Senecio niveus	SA: Northern Cape		Scholler et al. 2011.
Puccinia	lagenophorae	PREM59348	FJ669243	--	--	--		M. Mennicken	RSA149	FJ669243	2002	Asteraceae; Tripteris microcarpa subsp. microcarpa	SA: Northern Cape		Scholler et al. 2011.
Puccinia	lippiivora	BPI872247 / PREM59119	MG907248	--	--	--		A. Wood	AW637	U903	2006	Verbenaceae; Lippia javanica	SA: KwaZulu-Natal	III	This paper.
Puccinia	macowanii	BPI878030 / PREM59030	OQ215055	--	--	--		A. Wood	AW624	U745	2005	Asteraceae; Helichrysum sp.	SA: Mpumalanga	I; III	This paper.
Puccinia	melanocephala	N/A	JX036025	--	--	--		N/A	N/A	ME26	N/A	Poaceae; Saccharum hybrid	SA: KwaZulu-Natal		Martin et al. 2017.
Puccinia	mesembryanthemi	N/A	DQ917728	--	--	--		N/A	N/A	RSA166	N/A	Aizoaceae; Psilocaulon leptarthron	SA		Maier et al. 2007.
Puccinia	miscanthidii	BPI086397	KX908214	--	--	--		N/A	N/A	BPI086397	N/A	Poaceae; Miscanthus ecklonii	SA: KwaZulu-Natal		Martin et al. 2017.
Puccinia	moraeae	BPI871780 / PREM58678	OQ215056	--	--	--		A. Wood	AW587	U462	2004	Iridaceae; Moraea miniata	SA: Western Cape		This paper.
Puccinia	moraeae	PURN22761 / PREM61377	OQ215057	--	--	--		A. Wood	AW930	U1700	2018	Iridaceae; Moraea miniata	SA: Western Cape		This paper.
Puccinia	myrsiphylli	BPI871545 / PREM58367	OQ215058	--	--	--		A. Wood	AW571	U377	2004	Asparagaceae; Asparagus asparagoides	SA: Western Cape		This paper.
Puccinia	otzeniani	N/A	DQ917742	--	--	--		N/A	N/A	RSA164	N/A	Aizoaceae; Lampranthus otzenianus	SA		Maier et al. 2007.
Puccinia	oxalidis	BPI878054	OQ215059	--	--	--		M. Liebenberg	s.n.	U1162	2006	Oxalidaceae; Oxalis sp.	SA: KwaZulu-Natal		This paper.
Puccinia	oxalidis	BPI878055	OQ215060	--	--	--		M. Liebenberg	s.n.	U1163	2006	Oxalidaceae; Oxalis sp.	SA: KwaZulu-Natal		This paper.
Puccinia	pelargonii-zonalis	PURN16381	OQ215062	--	--	--		M.C. Aime	MCA6431	MCA6431	2016	Geraniaceae; Pelargonium sp.	Peru		This paper.
Puccinia	pelargonii-zonalis	PURN16715	OQ215061	--	--	--		M.C. Aime	MCA2529	MCA2529	2004	Geraniaceae; Pelargonium sp.	Ecuador		This paper.
Puccinia	penicillariae (as substriata)	TUB014989	DQ917743	--	--	--		N/A	N/A	TUB014989	N/A	Poaceae; Pennisetum glaucum	SA		Maier et al. 2007.
Puccinia	phyllocladiae	PURN22782 / PREM62243	OQ215067	--	--	--		A. Wood	AW1013	U1709	2018	Asparagaceae; Asparagus sp.	SA: KwaZulu-Natal		This paper.
Puccinia	polysora	BPI878059	OQ215068	--	--	--		M. Liebenberg	s.n.	U1161	2006	Poaceae; Zea mays	SA: KwaZulu-Natal		This paper.
Puccinia	porri	BRIP64600	KY849820	--	--	--		N/A	N/A	BRIP64600	N/A	Amaryllidaceae; Allium porrum	SA: Ganteng		McTaggart et al. 2017.
Puccinia	rapipes	N/A	MK874617	--	MK878621	--		N/A	N/A	Prap1	N/A	Solanaceae; Lycium ferocissimum	SA		Ireland et al. 2019
Puccinia	rapipes	N/A	MK874618	--	MK878622	--		N/A	N/A	Prap2	N/A	Solanaceae; Lycium ferocissimum	SA		Ireland et al. 2019
Puccinia	rapipes	N/A	MK874619	--	MK878623	--		N/A	N/A	Prap3	N/A	Solanaceae; Lycium ferocissimum	SA		Ireland et al. 2019
Puccinia	sorghi	BPI878071	GU057994	--	--	--		M. Liebenberg	s.n.	U1159	2006	Poaceae; Zea mays	SA: KwaZulu-Natal		Dixon et al. 2010.
Puccinia	sorghi	BPI878072	OQ215069	--	--	--		M. Liebenberg	s.n.	U1160	2006	Poaceae; Zea mays	SA: KwaZulu-Natal		This paper.
Puccinia	stobeae	BPI844314 / PREM58369	MG907251	--	--	--		A. Wood	AW550	U259	2004	Asteraceae; Berkheya speciosa	SA: KwaZulu-Natal		This paper.
Puccinia	stobeae	BPI871517 / PREM58372	OQ215070	--	--	--		A. Wood	AW558	U311	2003	Asteraceae; Berkheya rhapontica	SA: Free State		This paper.
Puccinia	stonemanniae	BPI871518 / PREM58373	OQ215071	--	--	--		A. Wood	AW562	U310	2004	Santalaceae; Thesium spicatum	SA: Western Cape		This paper.
Puccinia	tabernaemontanae	PURN22768 / PREM62245	OQ215072	OQ215141	OR789137	--		A. Wood	AW1018	U1717	2018	Apocynaceae; Tabernaemontana entricosa	SA: KwaZulu-Natal		This paper.
Puccinia	tetragoniae	BPI871786 / PREM60615	OQ215073	--	--	--		A. Wood	AW596	U442	2004	Aizoaceae; Tetragonia sp.	SA: Western Cape		This paper.
Puccinia	tetragoniae	N/A	DQ917733	--	--	--		N/A	N/A	RSA106	N/A	Aizoaceae; Tetragonia echinata	SA		Maier et al. 2007.
Puccinia	tetragoniae	BRIP 59703	KX999894	--	--	--		N/A	N/A	BRIP 59703	N/A	Aizoaceae; Tetragonia implexicoma	Australia		Marin-Felix et al. 2017.
Puccinia	thunbergiae	BPI844315 / PREM58370	OQ215074	--	--	--		A. Wood	AW543	U260	2004	Acanthaceae; Thunbergia dregeana	SA: KwaZulu-Natal		This paper.
Puccinia	ursiniae	BPI871788 / PREM58686	OQ215075	--	--	--		A. Wood	AW590	U463	2004	Asteraceae; Ursinia anthemoides	SA: Western Cape		This paper.
Puccinia	versicolor	BPI872252	MG907252	--	--	--		A. Wood	AW632	U902	2006	Poaceae; Heteropogon contortus	SA: North-West		Aime et al. 2018.
Puccinia	aristidae	PURN22503 / PREM60097	PP002597	--	--	--	var. chaetariae	A. Wood	AW604	U551	2004	Amaranthaceae; Pupalia sp.	SA: Mpumalanga	I	This paper.
Puccinia	windhoekensis	N/A	DQ917710	--	--	--		N/A	N/A	NA152	N/A	Cucurbitaceae; Coccinia rehmannii	SA		Maier et al. 2007
Pucciniastrum	minimum	PREM60245	GU355675	--	--	--		L. Mostert	s.n.	SN27	2006	Ericaceae; Vaccinium corymbosum	SA: Western Cape		Mostert et al. 2010.
Pucciniosira	anthocleistae	BPI871793 / PREM58687	OQ215076	--	--	--		A. Wood	AW585	U453	2004	Gentianaceae; Anthocleista grandiflora	SA: Mpumalanga		This paper.
Pucciniosira	dissotidis	PURN16342 / PREM60115	OQ215077	--	--	--		A. Wood	AW711	U1350	2008	Melastomataceae; Dissotis sp.	SA: KwaZulu-Natal		This paper.
Puccorchidium	popowiae	PURN22762 / PREM62246	OQ215078	--	--	--		A. Wood	AW1016	U1705	2018	Annonaceae; Monanthotaxis caffra	SA: KwaZulu-Natal		This paper.
Puccorchidium	popowiae	ZT Myc 1976	JF263495	JF263511	JF263528	--		N/A	N/A	ZTMyc1976	N/A	Annonaceae; Monanthotaxis caffra	N/A		Beenken et al. 2012.
Ravenelia	acaciae-nigrescentis	KR-M-0006413	MN072686	--	MN095329	--		N/A	N/A	KRM0006413	N/A	Fabaceae; Senegalia nigrescens	SA: Mpumalanga		Ebinghaus et al. 2020
Ravenelia	acaciae-nigrescentis	KR-M-0006619	MN072685	--	--	--		N/A	N/A	KRM0006619	N/A	Fabaceae; Senegalia nigrescens	SA: Mpumalanga		Ebinghaus et al. 2020
Ravenelia	acaciicola	PREM61847	MN072677	--	MN095313	--		N/A	N/A	PREM61847	N/A	Fabaceae; Senegalia senegal var. rostrata	SA: KwaZulu-Natal		Ebinghaus et al. 2020
Ravenelia	acaciicola	PREM61861	MN072683	--	MN095326	--		N/A	N/A	PREM61861	N/A	Fabaceae; Senegalia senegal var. leiorhachis	SA: Limpopo		Ebinghaus et al. 2020
Ravenelia	doidgeae	PREM60992	NG068899	--	MN095316	--		N/A	N/A	PREM60992	N/A	Fabaceae; Senegalia polyacantha ssp. polyacantha	SA: Mpumalanga		Ebinghaus et al. 2020
Ravenelia	dumeti	N/A	MN072680	--	--	--		N/A	N/A	ME406	N/A	Fabaceae; Senegalia brevispica	SA: Mpumalanga		Ebinghaus et al. 2020
Ravenelia	dumeti	PREM61877	NG068901	--	MN095306	--		N/A	N/A	PREM61877	N/A	Fabaceae; Senegalia brevispica	SA: Mpumalanga		Ebinghaus et al. 2020
Ravenelia	elephantorhizae	KR-M-0006449	MN072702	--	MN095341	--		N/A	N/A	KRM0006449	N/A	Fabaceae; Elephantorrhiza burkii	SA: North-West		Ebinghaus et al. 2020
Ravenelia	escharoides	BPI872255 / PREM59765	OQ215079	--	--	--		A. Wood	AW667	U1059	2006	Fabaceae; Senegalia burkei	SA: Limpopo		This paper.
Ravenelia	escharoides	KR-M-0043650	MG954480	--	MN095330	--		N/A	N/A	KRM0043650	N/A	Fabaceae; Senegalia burkei	SA: Mpumalanga		Ebinghaus & Begerow. 2018.; Ebinghaus et al. 2020.
Ravenelia	glabra	KR-M-000645	MN072691	--	MN095333	--		N/A	N/A	KRM000645	N/A	Fabaceae; Calpurnia aurea	SA: KwaZulu-Natal		Ebinghaus et al. 2020
Ravenelia	halsei	PREM61867	MN072682	--	MN095325	--		N/A	N/A	PREM61867	N/A	Fabaceae; Senegalia ataxacantha	SA: Mpumalanga		Ebinghaus et al. 2020
Ravenelia	indigoferae	PREM61061	MN072664	--	MN095308	--	aff.	N/A	N/A	PREM61061	N/A	Fabaceae; Indigofera sp.	SA: KwaZulu-Natal		Ebinghaus et al. 2020
Ravenelia	mesilliana	KR-M-0006424	MN072693	--	MN095334	--		N/A	N/A	KRM0006424	N/A	Fabaceae; Senna bicapsularis	SA: Mpumalanga		Ebinghaus et al. 2020
Ravenelia	modesta	PREM60791	MN072660	--	--	--		N/A	N/A	PREM60791	N/A	Fabaceae; Vachellia rehmanniana	SA: Limpopo		Ebinghaus et al. 2020
Ravenelia	modesta	PREM60795	MN072662	--	MN095306	--		N/A	N/A	PREM60795	N/A	Fabaceae; Vachellia luederitzii var. retinens	SA: Limpopo		Ebinghaus et al. 2020
Ravenelia	modjadjii	KR-M-0006422	MN072668	--	MN095312	--		N/A	N/A	KRM0006422	N/A	Fabaceae; Senegalia polyacantha ssp. campylacantha	SA: Limpopo		Ebinghaus et al. 2020
Ravenelia	modjadjii	PREM60788	MN072661	--	MN095305	--		N/A	N/A	PREM60788	N/A	Fabaceae; Senegalia polyacantha ssp. campylacantha	SA: Limpopo		Ebinghaus et al. 2020
Ravenelia	modjadjii	PREM61023	MN072667	--	MN095311	--		N/A	N/A	PREM61023	N/A	Fabaceae; Senegalia polyacantha ssp. campylacantha	SA: Limpopo		Ebinghaus et al. 2020
Ravenelia	molopa	PREM61879	NG068900	--	MN095323	--		N/A	N/A	PREM61879	N/A	Fabaceae; Senegalia galpinii	SA: Mpumalanga		Ebinghaus et al. 2020
Ravenelia	moloto	KR-M-0006445	NG068902	--	MN095340	--		N/A	N/A	KRM0006445	N/A	Fabaceae; Senegalia erubescens	SA: North-West		Ebinghaus et al. 2020
Ravenelia	moloto	PREM61890	MN072701	--	MN095340	--		N/A	N/A	PREM61890	N/A	Fabaceae; Senegalia erubescens	SA: North-West		Ebinghaus et al. 2020
Ravenelia	moloto	PREM61896	MN072700	--	MN095339	--		N/A	N/A	PREM61896	N/A	Fabaceae; Senegalia erubescens	SA: North-West		Ebinghaus et al. 2020
Ravenelia	ornata	BPI871795 / PREM58694	OQ215080	--	--	--		A. Wood	AW583	U450	2004	Fabaceae; Abrus precatorius	SA: Mpumalanga	II; III	This paper.
Ravenelia	ornata	BPI872256 / PREM59766	OQ215081	--	--	--		A. Wood	AW668	U1060	2006	Fabaceae; Abrus precatorius	SA: Limpopo		This paper.
Ravenelia	ornata	BPI910280	KY764175	--	--	--		N/A	N/A	BPI910280	N/A	Fabaceae; Abrus sp.	Phillipenes		Demers & Castlebury unpublished.
Ravenelia	ornata	KR-M-0006447	MN072687	--	--	--		N/A	N/A	KRM0006447	N/A	N/A	SA: Ganteng		Ebinghaus et al. 2020
Ravenelia	ornata	KR-M-0006617	MN072673	--	MN095317	--		N/A	N/A	KRM0006617	N/A	N/A	SA: Mpumalanga		Ebinghaus et al. 2020
Ravenelia	pienaarii	KR-M-0006442	MN072699	--	MN095338	--		N/A	N/A	KRM0006442	N/A	Fabaceae; Senegalia caffra	SA: Ganteng		Ebinghaus et al. 2020
Ravenelia	pienaarii	PREM61892	MG954482	--	MN095337	--		N/A	N/A	PREM61892	N/A	Fabaceae; Senegalia caffra	SA: Ganteng		Ebinghaus & Begerow. 2018.; Ebinghaus et al. 2020.
Ravenelia	pretoriensis	PREM60809	MN072659	--	--	--		N/A	N/A	PREM60809	N/A	Fabaceae; Vachellia karroo	SA: Ganteng		Ebinghaus et al. 2020
Ravenelia	pretoriensis	PREM61021	MN072665	--	MN095309	--		N/A	N/A	PREM61021	N/A	Fabaceae; Vachellia natalitia	SA: KwaZulu-Natal		Ebinghaus et al. 2020
Ravenelia	sp.	PURF19717	MW147024	MW166323	--	--		D. Eboh	s.n.	PUR136	1980	Fabaceae; Tephrosia	Nigeria		Aime & McTaggart 2021.
Ravenelia	spinifera	KR-M-0006416	MN072695	--	MN095335	--		N/A	N/A	KRM0006416	N/A	Fabaceae; Senegalia mellifera ssp. detinens	SA: Ganteng		Ebinghaus et al. 2020
Ravenelia	spinifera	KR-M-0006417	MN072696	--	MN095336	--		N/A	N/A	KRM0006417	N/A	Fabaceae; Senegalia mellifera ssp. detinens	SA: Ganteng		Ebinghaus et al. 2020
Ravenelia	spinifera	PREM61895	NG068903	--	--	--		N/A	N/A	PREM61895	N/A	Fabaceae; Senegalia mellifera ssp. detinens	SA: North-West		Ebinghaus et al. 2020
Ravenelia	stictica	N/A	MN072658	--	--	--		N/A	N/A	ME138	N/A	Fabaceae; Mundulea sericea	SA: Ganteng		Ebinghaus et al. 2020
Ravenelia	stictica	PREM60784	MN072663	--	MN095307	--		N/A	N/A	PREM60784	N/A	Fabaceae; Mundulea sericea	SA: Ganteng		Ebinghaus et al. 2020
Ravenelia	tephrosiae	PREM61003	MN072670	--	MN095315	--		N/A	N/A	PREM61003	N/A	Fabaceae; Tephrosia praecana	SA: Mpumalanga		Ebinghaus et al. 2020
Ravenelia	transvaalensis	PREM61024	MN072669	--	MN095313	--		N/A	N/A	PREM61024	N/A	Fabaceae; Senegalia mellifera ssp. detinens	SA: North-West		Ebinghaus et al. 2020
Ravenelia	transvaalensis	PREM61858	MG954485	--	MN095320	--		N/A	N/A	PREM61858	N/A	Fabaceae; Senegalia mellifera ssp. detinens	SA: North-West		Ebinghaus et al. 2020
Rogerpetersonia	torreyea	BPI877824	MG907207	MG907197	--	--		R. Peterson	82-10	U808	1982	Taxaceae; Torreya californica	United States: California		Aime et al. 2018.
Skierka	robusta	BPI879954 / PREM59047	MW049279	MW049305	--	--		A. Wood	AW623	U747	2005	Vitaceae; Rhoicissus rhomboidea	SA: KwaZulu-Natal	III	Aime & McTaggart 2021.
Sphaerophragmium	dalbergiae	BPI871797 / PREM59048	OQ215082	--	--	--		A. Wood	AW612	U541	2005	Fabaceae; Dalbergia armata	SA: KwaZulu-Natal	II	This paper.
Sphaerophragmium	sp. nov.	PREM63114	OQ215083	--	--	--		A. Wood	AW988	U1761	2018	Fabaceae; Senegalia brevispica	SA: KwaZulu-Natal		This paper.
Sphaerophragmium	sp.	BRIP56910	KJ862350	KJ862429	KJ862462	--		N/A	N/A	BRIP56910	N/A	Fabaceae; Albizia sp.	Australia		McTaggart et al. 2015.
Stomatisora	psychotriicola	KR-M-0034441 / PREM60886	KC709669	--	--	--		A Wood	AW805	PREM60886	2010	Rubiaceae; Psychotria capensis	SA: KwaZulu-Natal	III	Wood et al. 2014.
Stomatisora	psychotriicola	KR-M-0034442 / PREM60887	KC709670	--	--	--		A Wood	AW797	PREM60887	2010	Rubiaceae; Psychotria capensis	SA: KwaZulu-Natal	III	Wood et al. 2014.
Thekopsora	agrimoniae	BPI878089 / PREM59040	PP002596	--	--	--		A. Wood	AW561	U304	2004	Rosaceae; Leucosidea sericea	SA: KwaZulu-Natal	II	This paper.
Thekopsora	agrimoniae	PURN22786 / PREM62238	PP002595	--	--	--	aff.	A. Wood	AW986	U1713	2018	Rosaceae; Leucosidea sericea	SA: KwaZulu-Natal	II	This paper.
Thekopsora	potentillae	BPI878087	PP002594	--	--	--		R. Berndt	s.n.	U739	2005	Rosaceae; Agrimonia sp.	Switzerland		This paper.
Uredinopsis	cf. pteridis (as pteridis)	BRIP60091	KM249869	--	--	--		N/A	N/A	BRIP60091	N/A	Dennstaedtiaceae; Pteridium esculentum	Australia: Tasmainia		McTaggart et al. 2014.
Uredinopsis	pteridis	BPI871636/ PREM59050	OQ215085	--	--	--		A. Wood	AW606	U543	2005	Dennstaedtiaceae; Pteridium aquilinum	SA: Mpumalanga	II	This paper.
Uredinopsis	pteridis	BPI871637 / PREM59049	OQ215084	--	--	--		A. Wood	AW599	U542	2004	Dennstaedtiaceae; Pteridium aquilinum	SA: Western Cape	II	This paper.
Uredo	cryptolepidis	PURN22767 / PREM63123	OQ215086	OQ215142	OR789148	--		A. Wood	AW1017	U1716	2018	Apocynaceae; Cryptolepis capensis	SA: KwaZulu-Natal		This paper.
Uredo	cryptostegiae	BRIP56898	KT199401	KT199387	KT199412	--		N/A	N/A	BRIP56898	N/A	Apocynaceae; Cryptostegia grandiflora	Australia: Queensland		McTaggart et al. 2016.
Uredo	guerichiani	N/A	DQ917722	--	--	--		N/A	N/A	RSA29	N/A	Aizoaceae; Mesembranthemum guerichianum	SA		Maier et al. 2007.
Uredo	guerichiani	N/A	DQ917723	--	--	--		N/A	N/A	RSA153	N/A	Aizoaceae; Mesembranthemum guerichianum	SA		Maier et al. 2007.
Uredo	tarchonanthi	PURN22932 / PREM59054	OQ215087	OQ215143	--	--	cf.	A. Wood	AW598	U545	2004	Asteraceae; Tarchonanthus littoralis	SA: Western Cape		This paper.
Uredopeltis	atrides	PURN13866 / PREM59205	MW049286	--	--	--		A. Wood	AW582	U454	2004	Tiliaceae; Grewia flavescens	SA: Mpumalanga		Aime & McTaggart 2021.
Uredopeltis	chevalieri	PURN16412 / PREM60129	OQ215089	--	--	--		A. Wood	AW730	U1372	2008	Tiliaceae; Grewia monticola	SA: Mpumalanga		This paper.
Uredopeltis	chevalieri	PURN16515 / PREM60131	OQ215088	--	--	--		A. Wood	AW732	U1364	2008	Tiliaceae; Grewia hexamita	SA: Mpumalanga		This paper.
Uredopeltis	microspora	PURN16539 / PREM62324	OQ215090	--	--	--		A. Wood	AW728	U1371	2008	Tiliaceae; Grewia flavescens	SA: Limpopo		This paper.
Uredopeltis	zizyphi-vulgaris	PURN16465 / PREM60107	OQ215091	--	--	--		A. Wood	AW666	U1368	2006	Rhamnaceae; Ziziphus mucronata	SA: Limpopo	II	This paper.
Uromyces	albucae	BPI871802 / PREM58690	OQ215092	--	--	--		A. Wood	AW591	U447	2004	Liliaceae; Albuca sp.	SA: Northern Cape		This paper.
Uromyces	aloes	BPI871552 / PREM58380	OQ215093	--	--	--		A. Wood	AW567	U372	2004	Asphodelaceae; Aloe arborescens	SA: Western Cape		This paper.
Uromyces	aloes	N/A	DQ917740	--	--	--		N/A	N/A	WM3290	N/A	Asphodelaceae; Aloe arborescens	SA		Maier et al. 2007.
Uromyces	appendiculatus	BPI878117	OQ215094	--	--	--		M. Liebenberg	s.n.	U1148	2006	Fabaceae; Phaseolus vulgaris	SA: KwaZulu-Natal		This paper.
Uromyces	appendiculatus	BPI878118	OQ215095	--	--	--		M. Liebenberg	s.n.	U1149	2006	Fabaceae; Phaseolus vulgaris	SA: KwaZulu-Natal		This paper.
Uromyces	appendiculatus	BPI878121	OQ215096	--	--	--		M. Liebenberg	s.n.	U1152	2006	Fabaceae; Phaseolus vulgaris	SA: KwaZulu-Natal		This paper.
Uromyces	badius	PURN22778 / PREM62259	OQ215097	--	--	--		A. Wood	AW1002	U1693	2018	Amaryllidaceae; Haemanthus coccineus	SA: Western Cape		This paper.
Uromyces	bolusii	BPI871553 / PREM58382	OQ215098	--	--	--		A. Wood	AW572	U383	2004	Fabaceae; Aspalathus	SA: Western Cape	III	This paper.
Uromyces	bolusii	BPI878125 / PREM58383	OQ215099	--	--	--		A. Wood	AW578	U738	2000	Fabaceae; Aspalathus hirta	SA: Western Cape	III	This paper.
Uromyces	eclipsis	BPI871811 / PREM60142	OQ215101	--	--	--		A. Wood	AW594	U445	2004	Zygophyllaceae; Zygophyllum morgsana	SA: Northern Cape	I; III	This paper.
Uromyces	eriospermi	PURN22775 / PREM62272	OQ215102	--	--	--		A. Wood	AW975	U1698	2017	Eriospermaceae; Eriospermum sp.	SA: KwaZulu-Natal		This paper.
Uromyces	euryopsidicola	BPI844297 / PREM58122	OQ215103	--	--	--		A. Wood	AW295	U261	2001	Asteraceae; Euryops tenuissimus	SA: Western Cape	III	This paper.
Uromyces	euryopsidicola	BPI871554 / PREM58387	OQ215104	--	--	--		A. Wood	AW575	U381	2004	Asteraceae; Euryops tenuissimus	SA: Western Cape	III	This paper.
Uromyces	euryopsidicola	BPI871555 / PREM58386	OQ215105	--	--	--		A. Wood	AW568	U382	2004	Asteraceae; Euryops tenuissimus	SA: Western Cape	III	This paper.
Uromyces	euryopsidicola	BPI871681 / PREM58691	OQ215106	--	--	--		A. Wood	AW595	U464	2004	Asteraceae; Euryops tenuissimus	SA: Northern Cape	III	This paper.
Uromyces	heteromorphae	BPI871522 / PREM58388	OQ215107	--	--	--		A. Wood	AW556	U309	2004	Apiaceae; Peucedanum sp.	SA: Free State		This paper.
Uromyces	ixiae	BPI871806 / PREM58693	OQ215112	--	--	--		A. Wood	AW592	U451	2004	Iridaceae; Melasphaerula ramosa	SA: Northern Cape		This paper.
Uromyces	ixiae	BPI871807 / PREM58692	OQ215113	--	--	--		A. Wood	AW589	U452	2004	Iridaceae; Romulea tabularis	SA: Western Cape		This paper.
Uromyces	ixiae	N/A	DQ917737	--	--	--	cf.	N/A	N/A	RSA211	N/A	Iridaceae; Lapeirousia sp.	SA		Maier et al. 2007.
Uromyces	ixiae	N/A	DQ917738	--	--	--		N/A	N/A	RSA191	N/A	Iridaceae; Babiana tubulosa	SA		Maier et al. 2007.
Uromyces	ixiae	N/A	DQ917739	--	--	--		N/A	N/A	RSA8	N/A	Iridaceae; Babiana cf. sambucin	SA		Maier et al. 2007.
Uromyces	ixiae	PURN22487	OQ215110	--	--	--		A. Wood	s.n.	U1605	2013	Oxalidaceae; Oxalis pes-caprae	SA: Western Cape	I	This paper.
Uromyces	ixiae	PURN22489	OQ215111	--	--	--		A. Wood	s.n.	U1606	2013	Oxalidaceae; Oxalis pes-caprae	SA: Western Cape	I	This paper.
Uromyces	ixiae	PURN22760 / PREM62277	OQ215118	--	--	--		A. Wood	AW1007	U1701	2018	Iridaceae; Melasphaerula ramosa	SA: Western Cape		This paper.
Uromyces	ixiae	PURN22761	OQ215119	--	--	--		A. Wood	AW863a	U1702	2018	Iridaceae; Melasphaerula ramosa	SA: Western Cape		This paper.
Uromyces	ixiae	PURN22764 / PREM62278	OQ215115	--	--	--	cf.	A. Wood	AW1006	U1692	2018	Iridaceae; Geissorhiza monanthos	SA: Western Cape		This paper.
Uromyces	ixiae	PURN22774 / PREM62266	OQ215114	OQ215144	OR789136	--		A. Wood	AW1003	U1691	2018	Iridaceae; Romulea tabularis	SA: Western Cape		This paper.
Uromyces	ixiae	PURN22776 / PREM62258	OQ215117	--	--	--		A. Wood	AW1001	U1697	2018	Iridaceae; Sparaxis bulbillifera	SA: Western Cape		This paper.
Uromyces	ixiae	PURN22777 / PREM62259	OQ215116	--	--	--		A. Wood	AW1002	U1695	2018	Iridaceae; Sparaxis cf. villosa	SA: Western Cape		This paper.
Uromyces	ixiae	PURN23556 / PREM63296	OQ215109	--	--	--		A. Wood	AW929	U1550	2013	Oxalidaceae; Oxalis pes-caprae	SA: Western Cape	I	This paper.
Uromyces	ixiae	PURN23557 / PREM63297	OQ215108	--	--	--		A. Wood	AW949	U1549	2014	Oxalidaceae; Oxalis pes-caprae	SA: Western Cape	I	This paper.
Uromyces	kentaniensis	BPI871557	OQ215120	--	--	--		A. Wood	s.n.	U385	2004	Iridaceae; Chasmanthe aethiopica	SA: Western Cape		This paper.
Uromyces	lachenaliae	PURN22780 / PREM62281	OQ215121	--	--	--		A. Wood	AW979	U1706	2017	Hyacinthaceae: Lachenalia bulbilifera	SA: Western Cape		This paper.
Uromyces	massoniae	PURN22425 / PREM59068	OQ215100	--	--	--	cf.	A. Wood	AW586	U446	2006	Asparagaceae; Massonia pustulata	SA: Western Cape		This paper.
Uromyces	otaviensis	N/A	DQ917715	--	--	--		N/A	N/A	NA305	N/A	Convolvulaceae; Ipomoea verbascoides	SA		Maier et al. 2007.
Uromyces	pedicellatus	BPI004429	KY575114	--	--	--		N/A	N/A	BPI004429	N/A	Poaceae; Eragrostis tef	SA: Ganteng		Demers & Castlebury unpublished.
Uromyces	rhynchosiae	BPI878134 / PREM59069	OQ215122	--	--	--		A. Wood	AW625	U750	2005	Fabaceae; Eriosema psoraleoides	SA: Mpumalanga		This paper.
Uromyces	setariae-italicae	BPI871808 / PREM60096	OQ215124	--	--	--		A. Wood	AW603	U547	2004	Poaceae; Panicum maximum	SA: Mpumalanga	II	This paper.
Uromyces	setariae-italicae	BPI871809 / PREM60094	OQ215123	--	--	--		A. Wood	AW601	U546	2004	Poaceae; Urochloa mosambicensis	SA: Mpumalanga		This paper.
Uromyces	transversalis	BPI871558	OQ215125	--	--	--		C. Payne	El Paso 066823	U386	2004	Iridaceae; Gladiolus sp.	Mexico (US customs intercept)		This paper.
Uromycladium	acaciae	PREM61259	KR612241	--	--	--		N/A	N/A	PREM61259	N/A	Fabaceae; Acacia mearnsii	SA: Western Cape		McTaggart et al. 2015.
Uromycladium	acaciae	PREM61261	KR612243	--	--	--		N/A	N/A	PREM61261	N/A	Fabaceae; Acacia mearnsii	SA: Western Cape		McTaggart et al. 2015.
Uromycladium	morrisii (as tepperianum)	BPI871523	DQ323922	DQ323923	--	--		A. Wood	s.n.	U466	2004	Fabaceae; Acacia saligna	SA: Western Cape		Scholler & Aime 2006.
Uropyxis	diphysae	BPI864148	MW049288	--	--	--		J. Hernandez	2004-110	JRH310	2004	Fabaceae; Diphysa americana	Panama		Aime & McTaggart 2020.
a N/A = not available; s.n. = without number
b SA = South Africa
c References:
Aime MC, Bell C, Wilson AW. 2018. Deconstructing the evolutionary complexity of rust fungi (Pucciniales) and their hosts. Studies in Mycology 89: 143–152.
Aime MC, McTaggart AR. 2021. A higher-rank classification for rust fungi, with notes on genera. Fungal Systematics and Evolution 7:21-47.
Aime MC. 2006. Toward resolving family-level relationships in rust fungi (Uredinales). Mycoscience 47:112–122.
Beenken L, Wood, AR. 2015. Puccorchidium and Sphenorchidium, two new genera of Pucciniales on Annonaceae related to Puccinia psidii and the genus Dasyspora. Mycological Progress 14: 49.
Beenken L, Zoller S, Berndt R. 2012. Rust fungi on Annonaceae II: the genus Dasyspora Berk. & M.A. Curtis. Mycologia 104: 659-681.
Beenken L. 2014. Pucciniales on Annona (Annonaceae) with special focus on the genus Phakopsora.Mycological Progress 13: 791-809.
Dixon LJ, Castlebury LA, Aime MC, Glynn NC, Comstock JC. 2010. Phylogenetic relationships of sugarcane rust fungi. Mycological Progress 9:459–468.
Ebinghaus M, Begerow D. 2018. Ravenelia piepenbringiae and Ravenelia hernandezii, two new rust species on Senegalia (Fabaceae, Mimosoideae) from Panama and Costa Rica. MycoKeys 41: 51-63.
Ebinghaus M, Wingfield MJ, Begerow D, Maier W. 2020. The genus Ravenelia (Pucciniales) in South Africa. Mycological Progress 19: 259-290.
Ireland KB, Hunter GC, Wood A, Delaisse C, Morin L. 2019. Evaluation of the rust fungus Puccinia rapipes for biological control of Lycium ferocissimum (African boxthorn) in Australia: life cycle, taxonomy and pathogenicity. Fungal Biology 123: 811-823.
Maier W, Wingfield BD, Mennicken M, Wingfield MJ. 2007. Polyphyly and two emerging lineages in the rust genera Puccinia and Uromyces. Mycological Research 111: 176-185.
Marin-Felix Y, Groenewald JZ, Cai L, Chen Q, Marincowitz S, Barnes I, Bensch K, Braun U, Camporesi E, Damm U, de Beer ZW, Dissanayake A, Edwards J, Giraldo A, Hernandez-Restrepo M, Hyde KD, Jayawardena RS, Lombard L, Luangsa-Ard J, McTaggart AR, Rossman AY, Sandoval-Denis M, Shen M, Shivas RG,
	Tan YP, van der Linde EJ, Wingfield MJ, Wood AR, Zhang JQ, Zhang Y and Crous PW. 2017. Genera of phytopathogenic fungi: GOPHY 1. Studies in Mycolology. 86, 99-216 (2017)
Martin LA, Lloyd Evans D, Castlebury LA, Sifundza JT, Comstock JC, Rutherford RS, McFarlane SA. 2017. Macruropyxis fulva sp. nov., a new rust (Pucciniales) infecting sugarcane in southern Africa Australas. Plant Pathology 46: 63-74.
McTaggart AR, Aime MC. 2018. The species of Coleosporium (Pucciniales) on Solidago in North America. Fungal Biology 122: 800–809.
McTaggart AR, Beasley DR, Wingfield MJ, Wood AR, Pretorius ZA, Drenth A, Shivas RG, Roux J. 2017. A dynamic, web-based resource to identify rust fungi (Pucciniales)in southern Africa. MycoKeys 26: 77-83.
McTaggart AR, Berndt R, Geering ADW, Shivas RG. 2014. Uredinopsis pteridis and Desmella aneimiae, the first rust fungi (Pucciniales) reported on ferns (Pteridophyta) in Australia. Australasian Plant Disease Notes 9: 149.
McTaggart AR, Doungsa-ard C, Wingfield MJ, Roux J. 2015. Uromycladium acaciae, the cause of a sudden, severe disease epidemic on Acacia mearnsii in South Africa. Australas. Plant Pathology 44: 637–645.
McTaggart AR, Shivas RG, van der Nest MA, Roux J, Wingfield BD, Wingfield MJ. 2016. Host jumps shaped the diversity of extant rust fungi (Pucciniales). New Phytologist 209: 1149-1158.
Mostert L, Bester W, Jensen T, Coertze S, van Hoorn A, Le Roux J, Retief E, Wood A, Aime MC. 2010. First report of leaf rust of blueberry caused by Thekopsora minima on Vaccinium corymbosum in the Western Cape, South Africa. Plant Disease 94:478.
Oliveira LSS, Sulistyono E, Gaol PDML, Melia T, Duran,A. 2019. Plumeria rust caused by Coleosporium plumeriae on frangipani trees in Sumatra, Indonesia. Australasian Plant Disease Notes 14: 34.
Pota S, Chatasiri S, Unartngam J, Yamaoka Y, Hosaka K, Ono Y. 2015. Taxonomic identity of a Phakopsora fungus causing the grapevine leaf rust disease in Southeast Asia and Australasia. Mycoscience 56: 198-204.
Scholler M, Aime MC. 2006. On some rust fungi (Uredinales) collected in an Acacia koa-Metrosideros polymorpha woodland, Mauna Loa Road, Big Island, Hawaii. Mycoscience 47:159–165.
Scholler M, Lutz M, Wood AR, Hagedorn G, Mennicken M. 2011. Taxonomy and phylogeny of Puccinia lagenophorae: a study using rDNA sequence data, morphological and host range features Mycological Progress 10: 175-187.
Wood AR, Lutz M, Bauer R, Oberwinkler F. 2014. Morphology and phylogenetics of Stomatisora, including Stomatisora psychotriicola sp. nov. Mycological Progress 13: 1097-1104.
